# Supplementary material for: Novel Volumetric and Surface-Based Magnetic Resonance Indices of the Aging Brain – Does Male and Female Brain Age in the Same Way?
Source: Front Neurol. 2021 Jun 7;12:645729. doi: 10.3389/fneur.2021.645729 (PMC8216769; doi:10.3389/fneur.2021.645729)
Supplement: Supplementary file 1 [file Table_1.XLSX]

## Sheet: Results
	The results of the Kruskal-Wallis Test for specific anatomical ROI's
	No	ROI	Anatomical location	Sex	Cortical Thickness	Sulcus Depth	Gyrification Index	Fractal Dimension
					p value	p value	p value	p value
	5	lG_and_S_paracentral	Paracentral lobule and sulcus L	M	0.0005	0.2	0.4	0.05
			Paracentral lobule and sulcus L	F	0.00000000004	0.1	0.9	0.6
	6	rG_and_S_paracentral	Paracentral lobule and sulcus R	M	0.0002	0.5	0.008	0.8
			Paracentral lobule and sulcus R	F	0.000000000004	0.09	0.6	0.08
	7	lG_and_S_subcentral	Subcentral gyrus (central operculum) and sulci L	M	0.002	0.9	0.9	0.00004
			Subcentral gyrus (central operculum) and sulci L	F	0.002	0.6	0.4	0.006
	9	lG_and_S_transv_frontopol	Transverse frontopolar gyri and sulci L	M	0.000006	0.3	0.4	1
			Transverse frontopolar gyri and sulci L	F	0.00003	0.5	0.7	0.3
	10	rG_and_S_transv_frontopol	Transverse frontopolar gyri and sulci R	M	0.00002	0.03	0.3	0.3
			Transverse frontopolar gyri and sulci R	F	0.006	0.9	0.6	0.2
	14	rG_and_S_cingul_Mid_Ant	Middle-anterior part of the cingulate gyrus and sulcus (aMCC) R	M	0.00004	0.006	0.4	0.1
			Middle-anterior part of the cingulate gyrus and sulcus (aMCC) R	F	0.003	0.001	0.9	0.2
	19	lG_cingul_Post_ventral	Posterior-ventral part of the cingulate gyrus (vPCC. isthmus of the cingulate gyrus) L	M	0.9	0.4	0.9	0.0003
			Posterior-ventral part of the cingulate gyrus (vPCC, isthmus of the cingulate gyrus) L	F	0.5	0.4	0.2	0.0001
	21	lG_cuneus	Cuneus (O6) L	M	0.00001	0.4	0.7	0.2
			Cuneus (O6) L	F	0.000000005	0.2	0.9	0.8
	22	rG_cuneus	Cuneus (O6) R	M	0.00001	0.6	0.07	0.3
			Cuneus (O6) R	F	0.000007	0.6	0.5	0.5
	23	lG_front_inf_Opercular	Opercular part of the inferior frontal gyrus L	M	0.00000003	0.4	0.2	0.6
			Opercular part of the inferior frontal gyrus L	F	0.000001	0.08	0.01	0.3
	24	rG_front_inf_Opercular	Opercular part of the inferior frontal gyrus R	M	0.000003	0.4	0.05	0.2
			Opercular part of the inferior frontal gyrus R	F	0.0000003	0.1	0.06	0.1
	25	lG_front_inf_Orbital	Orbital part of the inferior frontal gyrus L	M	0.00009	0.2	0.08	0.3
			Orbital part of the inferior frontal gyrus	F	0.1	0.2	0.02	0.1
	27	lG_front_inf_Triangul	Triangular part of the inferior frontal gyrus L	M	0.0000005	0.6	0.8	0.8
				F	0.00001	0.001	0.2	0.7
	28	rG_front_inf_Triangul	Triangular part of the inferior frontal gyrus R	M	0.00001	0.9	0.01	0.5
			Triangular part of the inferior frontal gyrus R	F	0.000003	0.6	0.2	0.3
	29	lG_front_middle	Middle frontal gyrus (F2) L	M	0.00000006	0.06	0.8	0.1
			Middle frontal gyrus (F2) L	F	0.0000002	0.1	0.08	0.6
	30	rG_front_middle	Middle frontal gyrus (F2) R	M	0.00000001	0.2	0.04	0.02
			Middle frontal gyrus (F2) R	F	0.0000000001	0.2	0.4	1
	31	lG_front_sup	Superior frontal gyrus (F1) L	M	0.0000000003	0.03	0.9	0.6
			Superior frontal gyrus (F1)	F	0.00000000002	0.6	0.6	0.02
	32	rG_front_sup	Superior frontal gyrus (F1) R	M	0.000000002	0.1	0.7	0.3
			Superior frontal gyrus (F1)	F	0.00000000000004	0.03	0.7	0.5
	34	rG_Ins_lg_and_S_cent_ins	Long insular gyrus and central sulcus of the insula	M	0.002	0.1	0.03	0.08
			Long insular gyrus and central sulcus of the insula	F	0.00000003	0.01	0.03	0.09
	35	lG_insular_short	Short insular gyri L	M	0.07	0.3	0.7	0.00008
			Short insular gyri	F	0.0002	0.007	0.09	0.00000001
	36	rG_insular_short	Short insular gyri R	M	0.6	0.4	0.06	0.0008
			Short insular gyri	F	0.2	0.1	0.5	0.00005
	39	lG_occipital_sup	Superior occipital gyrus (O1) L	M	0.0001	0.7	0.1	0.2
			Superior occipital gyrus (O1)	F	0.0005	0.2	0.5	0.8
	40	rG_occipital_sup	Superior occipital gyrus (O1) R	M	0.0008	0.8	0.2	0.1
			Superior occipital gyrus (O1)	F	0.0001	0.08	0.9	0.02
	41	lG_oc_temp_lat_fusifor	Lateral occipito-temporal gyrus (fusiform gyrus. O4-T4) L	M	0.0000004	0.7	0.7	0.6
			Lateral occipito-temporal gyrus (fusiform gyrus, O4-T4)	F	0.002	0.03	0.4	0.8
	43	lG_oc_temp_med_Lingual	Lingual gyrus. ligual part of the medial occipito-temporal gyrus. (O5) L	M	0.00005	0.8	0.5	0.2
			Lingual gyrus, ligual part of the medial occipito-temporal gyrus, (O5)	F	0.000000003	0.9	1	0.3
	44	rG_oc_temp_med_Lingual	Lingual gyrus. ligual part of the medial occipito-temporal gyrus. (O5) R	M	0.0006	0.4	0.4	0.6
			Lingual gyrus, ligual part of the medial occipito-temporal gyrus, (O5)	F	0.00009	0.9	0.6	0.3
	45	lG_oc_temp_med_Parahip	Parahippocampal gyrus. parahippocampal part of the medial occipito-temporal gyrus. (T5) L	M	0.0001	1	0.2	1
			Parahippocampal gyrus, parahippocampal part of the medial occipito-temporal gyrus, (T5)	F	0.002	0.6	0.6	0.5
	46	rG_oc_temp_med_Parahip	Parahippocampal gyrus. parahippocampal part of the medial occipito-temporal gyrus. (T5) R	M	0.0000009	0.4	0.2	0.3
			Parahippocampal gyrus, parahippocampal part of the medial occipito-temporal gyrus, (T5)	F	0.00000002	0.02	0.3	0.08
	49	lG_pariet_inf_Angular	Angular gyrus L	M	0.0000007	1	0.3	0.2
			Angular gyrus	F	0.0002	0.9	0.2	0.8
	50	rG_pariet_inf_Angular	Angular gyrus R	M	0.00000004	0.8	0.04	0.8
			Angular gyrus	F	0.000003	0.5	0.0006	0.2
	51	lG_pariet_inf_Supramar	Supramarginal gyrus L	M	0.000004	0.9	0.02	0.1
			Supramarginal gyrus	F	0.0009	0.2	0.0001	0.2
	52	rG_pariet_inf_Supramar	Supramarginal gyrus R	M	0.00007	0.7	0.0008	0.03
			Supramarginal gyrus	F	0.00002	0.9	0.06	0.3
	53	lG_parietal_sup	Superior parietal lobule (lateral part of P1) L	M	0.00000004	0.7	0.6	0.2
			Superior parietal lobule (lateral part of P1)	F	0.0000000008	0.006	0.02	0.7
	54	rG_parietal_sup	Superior parietal lobule (lateral part of P1) R	M	0.00000005	0.9	0.007	0.9
			Superior parietal lobule (lateral part of P1)	F	0.0000000003	0.1	0.0009	0.03
	55	lG_postcentral	Postcentral gyrus L	M	0.000003	1	0.3	0.4
			Postcentral gyrus	F	0.00000000003	0.7	0.02	0.05
	56	rG_postcentral	Precentral gyrus R	M	0.000007	0.8	0.2	0.6
			Precentral gyrus	F	0.000000002	0.5	0.2	0.8
	57	lG_precentral	Precentral gyrus L	M	0.00002	0.9	0.9	0.05
			Precentral gyrus	F	0.0000000000001	0.7	0.01	0.001
	58	rG_precentral	Precentral gyrus R	M	0.0000006	0.7	0.6	0.02
			Precentral gyrus	F	0.000000000001	0.6	0.1	0.005
	59	lG_precuneus	Precuneus (medial part of P1) L	M	0.00002	0.9	0.9	0.05
			Precuneus (medial part of P1)	F	0.0000000000001	0.7	0.01	0.001
	60	rG_precuneus	Precuneus (medial part of P1) R	M	0.0000006	0.7	0.6	0.02
			Precuneus (medial part of P1)	F	0.000000000001	0.6	0.1	0.005
	64	rG_subcallosal	Subcallosal area. subcallosal gyrus	M	0.1	0.07	0.3	0.3
			Subcallosal area, subcallosal gyrus	F	1	0.000001	0.3	0.1
	65	lG_temp_sup_G_T_transv	Anterior transverse temporal gyrus (of Heschl) L	M	0.00000000004	0.2	0.0009	0.05
			Anterior transverse temporal gyrus (of Heschl)	F	0.0000000000000002	0.00000008	0.04	0.06
	66	rG_temp_sup_G_T_transv	Anterior transverse temporal gyrus (of Heschl) R	M	0.000000002	0.0009	0.1	0.06
			Anterior transverse temporal gyrus (of Heschl)	F	0.00000000000001	0.00001	0.2	0.5
	67	lG_temp_sup_Lateral	Lateral aspect of the superior temporal gyrus L	M	0.0000008	0.4	0.8	0.9
			Lateral aspect of the superior temporal gyrus	F	0.00006	0.02	0.1	0.7
	68	rG_temp_sup_Lateral	Lateral aspect of the superior temporal gyrus R	M	0.000006	0.4	0.02	0.5
			Lateral aspect of the superior temporal gyrus	F	0.0000000002	0.04	0.02	0.5
	69	lG_temp_sup_Plan_polar	Planum polare of the superior temporal gyrus L	M	0.00008	0.02	0.2	0.2
			Planum polare of the superior temporal gyrus	F	0.00000001	0.00000004	0.2	0.8
	70	rG_temp_sup_Plan_polar	Planum polare of the superior temporal gyrus R	M	0.00002	0.0000003	0.6	0.3
			Planum polare of the superior temporal gyrus	F	0.00000000003	0.00000000009	0.4	0.2
	71	lG_temp_sup_Plan_tempo	Planum temporale or temporal plane of the superior temporal gyrus L	M	0.0000000002	0.5	0.1	0.7
			Planum temporale or temporal plane of the superior temporal gyrus	F	0.0000000004	0.001	0.03	0.9
	72	rG_temp_sup_Plan_tempo	Planum temporale or temporal plane of the superior temporal gyrus R	M	0.00000003	0.03	0.6	0.4
			Planum temporale or temporal plane of the superior temporal gyrus	F	0.00000000005	0.002	0.2	0.6
	75	lG_temporal_middle	Middle temporal gyrus (T2) L	M	0.00008	1	0.9	0.6
			Middle temporal gyrus (T2)	F	0.0000005	0.8	0.04	0.5
	76	rG_temporal_middle	Middle temporal gyrus (T2) R	M	0.00004	0.7	0.5	0.5
			Middle temporal gyrus (T2)	F	0.000002	0.7	0.5	0.5
	78	rLat_Fis_ant_Horizont	Horizontal ramus of the anterior segment of the lateral sulcus (or fissure) R	M	0.01	0.007	0.04	0.05
			Horizontal ramus of the anterior segment of the lateral sulcus (or fissure)	F	0.009	0.00001	0.6	0.5
	79	lLat_Fis_ant_Vertical	Vertical ramus of the anterior segment of the lateral sulcus (or fissure) L	M	0.03	0.5	0.8	0.6
			Vertical ramus of the anterior segment of the lateral sulcus (or fissure)	F	0.003	0.00002	0.5	0.6
	81	lLat_Fis_post	Posterior ramus (or segment) of the lateral sulcus (or fissure) L	M	0.00005	0.2	0.009	0.08
			Posterior ramus (or segment) of the lateral sulcus (or fissure)	F	0.05	0.00008	0.05	0.03
	82	rLat_Fis_post	Posterior ramus (or segment) of the lateral sulcus (or fissure) R	M	0.1	0.03	0.000004	0.04
			Posterior ramus (or segment) of the lateral sulcus (or fissure)	F	0.0002	0.0002	0.00000002	0.003
	83	lPole_occipital	Occipital pole L	M	0.01	0.02	0.5	0.01
			Occipital pole	F	0.00001	0.05	0.2	0.5
	84	rPole_occipital	Occipital pole R	M	0.002	0.6	0.4	0.09
			Occipital pole	F	0.00003	0.2	0.1	0.8
	85	lPole_temporal	Temporal pole L	M	0.003	0.6	0.0006	0.2
			Temporal pole	F	0.000006	0.01	0.1	0.4
	86	rPole_temporal	Temporal pole R	M	0.0005	0.006	0.02	1
			Temporal pole	F	0.00000003	0.00009	0.01	0.4
	87	lS_calcarine	Calcarine sulcus L	M	0.0003	0.8	0.7	0.2
			Calcarine sulcus	F	0.00002	0.9	0.7	0.3
	88	rS_calcarine	Calcarine sulcus R	M	0.04	0.7	0.7	0.2
			Calcarine sulcus	F	0.00001	0.5	0.4	0.7
	89	lS_central	Central sulcus (Rolando’s fissure) L	M	0.0000009	0.6	0.02	0.2
			Central sulcus (Rolando’s fissure)	F	0.000000000000007	0.7	0.2	0.4
	90	rS_central	Central sulcus (Rolando’s fissure) R	M	0.0000004	0.3	0.008	0.1
				F	p	0.02	0.4	0.1
	92	rS_cingul_Marginalis	Marginal branch (or part) of the cingulate sulcus R	M	0.000002	0.02	0.06	0.4
			Marginal branch (or part) of the cingulate sulcus	F	0.5	0.1	0.2	0.9
	93	lS_circular_insula_ant	Anterior segment of the circular sulcus of the insula L	M	0.5	0.02	0.06	0.3
			Anterior segment of the circular sulcus of the insula	F	0.1	0.000003	0.3	0.03
	94	rS_circular_insula_ant	Anterior segment of the circular sulcus of the insula R	M	0.09	0.00009	0.05	0.2
			Anterior segment of the circular sulcus of the insula	F	0.8	0.000002	0.6	0.02
	95	lS_circular_insula_inf	Inferior segment of the circular sulcus of the insula L	M	0.0000000000005	0.5	0.000000004	0.7
			Inferior segment of the circular sulcus of the insula	F	0.000000000003	0.000006	0.00000000000004	0.8
	96	rS_circular_insula_inf	Inferior segment of the circular sulcus of the insula R	M	0.0000000005	0.002	0.00000002	0.8
			Inferior segment of the circular sulcus of the insula	F	0.0000000000000006	0.000003	0.000000000006	0.4
	97	lS_circular_insula_sup	Superior segment of the circular sulcus of the insula L	M	0.4	0.2	0.003	0.00004
			Superior segment of the circular sulcus of the insula	F	0.5	0.000002	0.0000004	0.0000000009
	98	rS_circular_insula_sup	Superior segment of the circular sulcus of the insula R	M	0.9	0.003	0.0003	0.0002
			Superior segment of the circular sulcus of the insula	F	0.01	0.00001	0.001	0.01
	99	lS_collat_transv_ant	Anterior transverse collateral sulcus L	M	0.4	0.2	0.09	0.2
			Anterior transverse collateral sulcus	F	0.04	0.0001	0.4	0.4
	107	lS_front_sup	Superior frontal sulcus L	M	0.0001	0.09	0.4	0.7
			Superior frontal sulcus	F	0.00008	0.1	0.1	0.01
	108	rS_front_sup	Superior frontal sulcus R	M	0.00001	0.2	0.8	0.4
			Superior frontal sulcus	F	0.00002	0.2	0.07	0.6
	111	lS_intrapariet_and_P_trans	Intraparietal sulcus (interparietal sulcus) and transverse parietal sulci L	M	0.00008	0.3	0.4	0.007
			Intraparietal sulcus (interparietal sulcus) and transverse parietal sulci	F	0.1	0.4	0.4	0.01
	112	rS_intrapariet_and_P_trans	Intraparietal sulcus (interparietal sulcus) and transverse parietal sulci R	M	0.00003	0.1	0.2	0.05
			Intraparietal sulcus (interparietal sulcus) and transverse parietal sulci	F	0.000001	0.9	0.8	0.07
	121	lS_oc_temp_med_and_Lingual	Medial occipito-temporal sulcus (collateral sulcus) and lingual sulcus L	M	0.7	0.2	0.1	0.01
			Medial occipito-temporal sulcus (collateral sulcus) and lingual sulcus	F	0.1	0.00003	0.05	0.3
	122	rS_oc_temp_med_and_Lingual	Medial occipito-temporal sulcus (collateral sulcus) and lingual sulcus R	M	0.5	0.002	0.2	0.2
			Medial occipito-temporal sulcus (collateral sulcus) and lingual sulcus	F	0.7	0.00004	0.3	0.4
	133	lS_postcentral	Postcentral sulcus L	M	0.00008	0.8	0.1	0.1
			Postcentral sulcus	F	0.000004	0.4	0.7	0.00004
	134	rS_postcentral	Postcentral sulcus R	M	0.0001	0.05	0.1	0.02
			Postcentral sulcus	F	0.00001	0.4	0.1	0.2
	135	lS_precentral_inf_part	Inferior part of the precentral sulcus L	M	0.003	0.8	0.8	0.008
			Inferior part of the precentral sulcus	F	0.00007	0.2	0.8	0.005
	136	rS_precentral_inf_part	Inferior part of the precentral sulcus R	M	0.003	0.02	0.5	0.4
			Inferior part of the precentral sulcus	F	0.000001	0.04	0.6	0.02
	137	lS_precentral_sup_part	Superior part of the precentral sulcus L	M	0.0006	0.3	0.3	0.7
			Superior part of the precentral sulcus	F	0.00000006	0.2	0.6	0.06
	138	rS_precentral_sup_part	Superior part of the precentral sulcus R	M	0.0006	0.02	0.8	0.8
			Superior part of the precentral sulcus	F	0.00000004	0.06	0.4	0.6
	147	lS_temporal_transverse	Transverse temporal sulcus L	M	0.0004	0.3	0.9	0.7
			Transverse temporal sulcus	F	0.00000002	0.000006	0.4	0.2
	148	rS_temporal_transverse	Transverse temporal sulcus R	M	0.0002	0.002	0.5	0.4
			Transverse temporal sulcus	F	0.00000000001	0.000008	0.3	0.6
